Corrigendum: Prog. Theor. Exp. Phys. 2020, ptaa114 (2020)

**Corrigendum to: The TianQin project: current progress on science and technology**

Jianwei Mei<sup>1</sup>, Yan-Zheng Bai<sup>2</sup>, Jiahui Bao<sup>1</sup>, Enrico Barausse<sup>3</sup>, Lin Cai<sup>2</sup>, Enrico Canuto<sup>4</sup>, Bin Cao<sup>1</sup>, Wei-Ming Chen<sup>1</sup>, Yu Chen<sup>1</sup>, Yan-Wei Ding<sup>1</sup>, Hui-Zong Duan<sup>1</sup>, Huimin Fan<sup>2</sup>, Wen-Fan Feng<sup>2</sup>, Honglin Fu<sup>5</sup>, Qing Gao<sup>6</sup>, TianQuan Gao<sup>1</sup>, Yungui Gong<sup>2</sup>, Xingyu Gou<sup>7</sup>, Chao-Zheng Gu<sup>1</sup>, De-Feng Gu<sup>1</sup>, Zi-Qi He<sup>1</sup>, Martin Hendry<sup>8</sup>, Wei Hong<sup>2</sup>, Xin-Chun Hu<sup>2</sup>, Yi-Ming Hu<sup>1</sup>, Yuexin Hu<sup>9</sup>, Shun-Jia Huang<sup>1</sup>, Xiang-Qing Huang<sup>1</sup>, Qinghua Jiang<sup>7</sup>, Yuan-Ze Jiang<sup>1</sup>, Yun Jiang<sup>1</sup>, Zhen Jiang<sup>10,11</sup>, Hong-Ming Jin<sup>2</sup>, Valeriya Korol<sup>12</sup>, Hong-Yin Li<sup>2</sup>, Ming Li<sup>1</sup>, Ming Li<sup>9</sup>, Pengcheng Li<sup>13</sup>, Rongwang Li<sup>5</sup>, Yuqiang Li<sup>5</sup>, Zhu Li<sup>1</sup>, Zhulian Li<sup>5</sup>, Zhu-Xi Li<sup>2</sup>, Yu-Rong Liang<sup>2</sup>, Zheng-Cheng Liang<sup>2</sup>, Fang-Jie Liao<sup>1</sup>, Qi Liu<sup>1</sup>, Shuai Liu<sup>1</sup>, Yan-Chong Liu<sup>2</sup>, Li Liu<sup>2</sup>, Pei-Bo Liu<sup>1</sup>, Xuhui Liu<sup>7</sup>, Yuan Liu<sup>1</sup>, Xiong-Fei Lu<sup>1</sup>, Yang Lu<sup>1</sup>, Ze-Huang Lu<sup>2</sup>, Yan Luo<sup>1</sup>, Zhi-Cai Luo<sup>2</sup>, Vadim Milyukov<sup>14</sup>, Min Ming<sup>2</sup>, Xiaoyu Pi<sup>5</sup>, Chenggang Qin<sup>2</sup>, Shao-Bo Qu<sup>2</sup>, Alberto Sesana<sup>15</sup>, Chenggang Shao<sup>2</sup>, Changfu Shi<sup>1</sup>, Wei Su<sup>2</sup>, Ding-Yin Tan<sup>2</sup>, Yujie Tan<sup>2</sup>, Zhuangbin Tan<sup>1</sup>, Liang-Cheng Tu<sup>1,2</sup>, Bin Wang<sup>16</sup>, Cheng-Rui Wang<sup>2</sup>, Fengbin Wang<sup>9</sup>, Guan-Fang Wang<sup>1</sup>, Haitian Wang<sup>17</sup>, Jian Wang<sup>1</sup>, Lijiao Wang<sup>7</sup>, Panpan Wang<sup>2</sup>, Xudong Wang<sup>7</sup>, Yan Wang<sup>2</sup>, Yi-Fan Wang<sup>18,19</sup>, Ran Wei<sup>20</sup>, Shu-Chao Wu<sup>2</sup>, Chun-Yu Xiao<sup>2</sup>, Xiao-Shi Xu<sup>1</sup>, Chao Xue<sup>1</sup>, Fang-Chao Yang<sup>2</sup>, Liang Yang<sup>1</sup>, Ming-Lin Yang<sup>1</sup>, Shan-Qing Yang<sup>1</sup>, Bobing Ye<sup>1</sup>, Hsien-Chi Yeh<sup>1</sup>, Shenghua Yu<sup>11</sup>, Dongsheng Zhai<sup>5</sup>, Caishi Zhang<sup>1</sup>, Haitao Zhang<sup>5</sup>, Jian-dong Zhang<sup>1</sup>, Jie Zhang<sup>2</sup>, Lihua Zhang<sup>9</sup>, Xin Zhang<sup>21</sup>, Xuefeng Zhang<sup>1</sup>, Hao Zhou<sup>2</sup>, Ming-Yue Zhou<sup>2</sup>, Ze-Bing Zhou<sup>2</sup>, Dong-Dong Zhu<sup>2</sup>, Tie-Guang Zi<sup>1</sup>, Jun Luo<sup>1,2,\*</sup>

<sup>1</sup>TianQin Research Center for Gravitational Physics & School of Physics and Astronomy, Sun Yat-sen University (Zhuhai Campus), Zhuhai 519082, P.R. China

<sup>2</sup>Centre for Gravitational Experiments, School of Physics, MOE Key Laboratory of Fundamental Physical Quantities Measurement & Hubei Key Laboratory of Gravitation and Quantum Physics, PGMF, Huazhong University of Science and Technology, Wuhan 430074, P.R. China

<sup>3</sup>SISSA, Via Bonomea 265, 34136 Trieste, Italy and INFN Sezione di Trieste & IFPU – Institute for Fundamental Physics of the Universe, Via Beirut 2, 34014 Trieste, Italy

<sup>4</sup>Former Faculty, Politecnico di Torino, Corso Duca degli Abruzzi 24, 10129, Torino, Italy

<sup>5</sup>Yunnan Observatories, Chinese Academy of Sciences, Kunming 650011, China

<sup>6</sup>School of Physical Science and Technology, Southwest University, Chongqing 400715, China

<sup>7</sup>Beijing Institute of Control Engineering, Beijing 100094, P.R. China

<sup>8</sup>SUPA, School of Physics and Astronomy, University of Glasgow, Glasgow G12 8QQ, UK

<sup>9</sup>DFH Satellite Co., Ltd., Beijing 100094, P.R. China

<sup>10</sup>National Astronomical Observatories, Chinese Academy of Sciences, Beijing 100012, China

<sup>11</sup>School of Astronomy and Space Science, University of Chinese Academy of Sciences, Beijing 100049, China

<sup>12</sup>School of Physics and Astronomy, University of Birmingham, Birmingham B15 2TT, United Kingdom

<sup>13</sup>Center for High Energy Physics & Department of Physics and State Key Laboratory of Nuclear Physics and Technology, Peking University, No. 5 Yiheyuan Rd, Beijing 100871, P.R. China

<sup>14</sup>Lomonosov Moscow State University, Sternberg Astronomical Institute, Moscow 119992, Russia

<sup>15</sup>Dipartimento di Fisica “G. Occhialini”, Università degli Studi Milano Bicocca, Piazza della Scienza 3, I-20126 Milano, Italy

<sup>16</sup>School of Aeronautics and Astronautics, Shanghai Jiao Tong University, Shanghai 200240, China

<sup>17</sup>Purple Mountain Observatory, Chinese Academy of Sciences, Nanjing 210023 & School of Astronomy and Space Science, University of Science and Technology of China, Hefei, Anhui 230026, P.R. China

<sup>18</sup>Max-Planck-Institut für Gravitationsphysik (Albert-Einstein-Institut), D-30167 Hannover, Germany

<sup>19</sup>Leibniz Universität Hannover, D-30167 Hannover, Germany

<sup>20</sup>Beijing Institute of Spacecraft System Engineering, Beijing 100094, P.R. China

© The Author(s) 2020. Published by Oxford University Press on behalf of the Physical Society of Japan.

This is an Open Access article distributed under the terms of the Creative Commons Attribution License (<http://creativecommons.org/licenses/by/4.0/>), which permits unrestricted reuse, distribution, and reproduction in any medium, provided the original work is properly cited.

<sup>21</sup>*Department of Physics, College of Sciences & MOE Key Laboratory of Data Analytics and Optimization for Smart Industry, Northeastern University, Shenyang 110819, China*  
\*E-mail: junluo@mail.sysu.edu.cn

Published May 23, 2021

In the originally published version, this manuscript included an error related to indicating the corresponding author within the author list. This has now been corrected online to reflect the fact that author Jun Luo is the corresponding author of the article.
